# Supplementary material for: Non-invasive diffuse optical neuromonitoring during cardiopulmonary resuscitation predicts return of spontaneous circulation
Source: PubMed Central journal article supplement (PMC7884428; doi:10.1038/s41598-021-83270-5), 2021-02-15
Supplement: 41598_2021_83270_MOESM1_ESM.pdf [file 41598_2021_83270_MOESM1_ESM.pdf]

# **Non-invasive diffuse optical neuromonitoring during cardiopulmonary resuscitation predicts return of spontaneous circulation**

**Tiffany S. Ko, Constantine D. Mavroudis, Ryan W. Morgan, Wesley B. Baker, Alexandra M. Marquez, Timothy W. Boorady, Mahima Devarajan, Yuxi Lin, Anna L. Roberts, William P. Landis, Kobina Mensah-Brown, Vinay M. Nadkarni, Robert A. Berg, Robert M. Sutton, Arjun G. Yodh, Daniel J. Licht, Wensheng Guo, and Todd J. Kilbaugh**

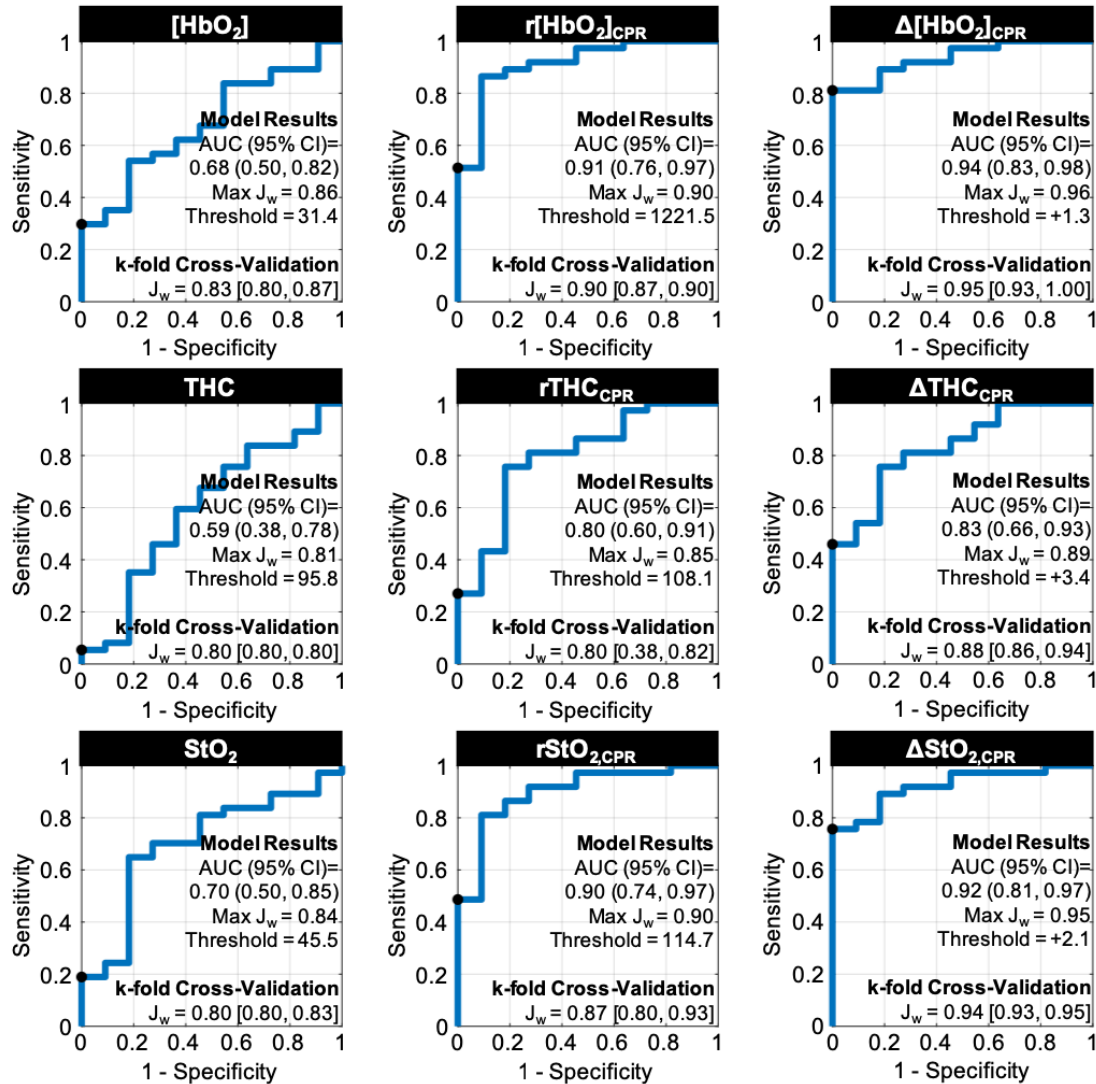

**Supplementary Figure S1. ROC Curves for Prediction of ROSC:** Receiver operating characteristic (ROC) curves for the prediction of ROSC are depicted in individual sub-panels for each cerebral hemodynamic parameter. The point on the ROC curve corresponding to the maximum weight Youden index ( $J_w$ ) and optimal decision threshold is marked (black dot). These values are listed within the sub-panel alongside the AUC of the ROC curve and the distribution of  $J_w$  values resulting from k-fold ( $k=10$ ) cross validation. The optimal predictor,  $\Delta[\text{HbO}_2]_{\text{CPR}}$ , achieved an AUC of 0.94 and a  $J_w$  of 0.96, corresponding to a decision threshold of  $\Delta[\text{HbO}_2]_{\text{CPR}} = +1.3\mu\text{mol/L}$ .

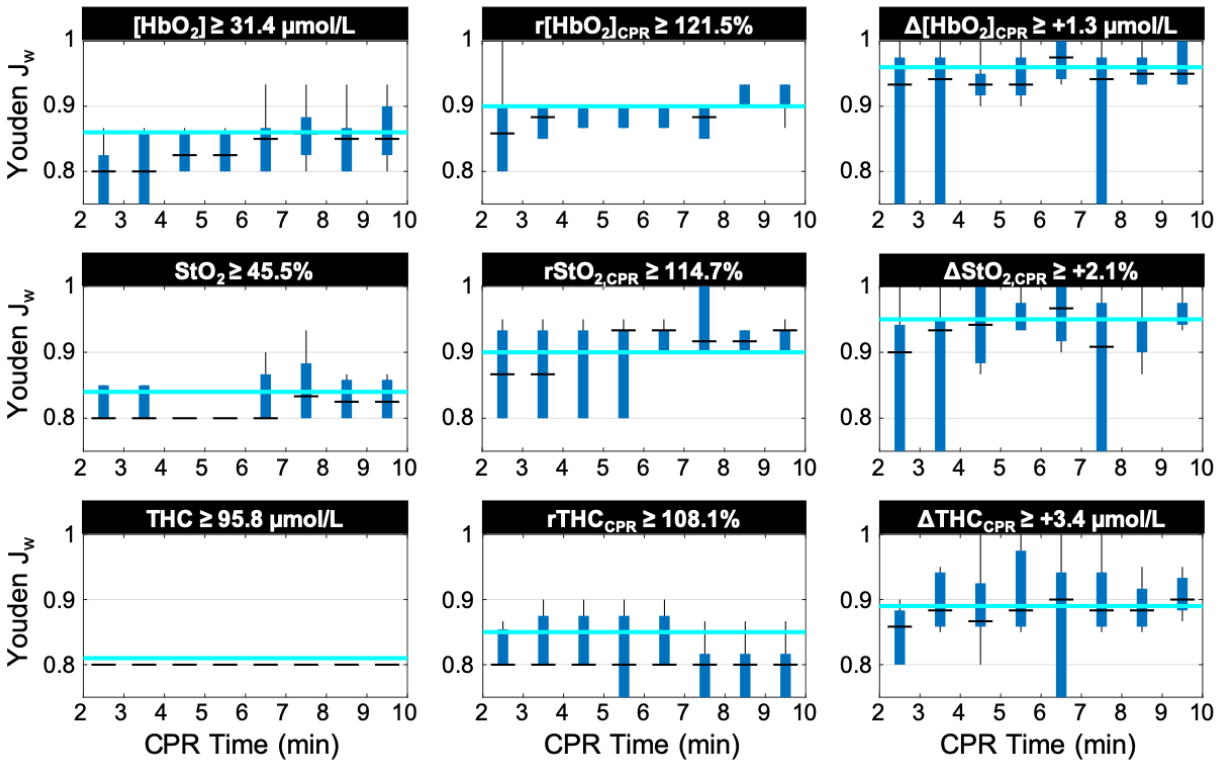

**Supplementary Figure S2. Time-Dependent Prediction Performance and Variability during Early CPR:** The predictive performance ( $J_w$ ) of the optimal decision threshold (sub-panel title), across 10 test folds, is summarized (median, *horizontal line*; interquartile range, *box*; range, *whisker*) minute-to-minute from two to 10 minutes of CPR, for each cerebral hemodynamic parameter. Within each 1-minute interval, the decision threshold was applied to predict ROSC in each test fold and a  $J_w$  was calculated from the sensitivity and specificity of prediction. This provides a realistic rendering of the variability and time-dependence of each parameter's predictive performance. For comparison, the parameter's max  $J_w$  derived from the original predictive model trained on mean 2-10min CPR data, is overlaid as a horizontal cyan line.

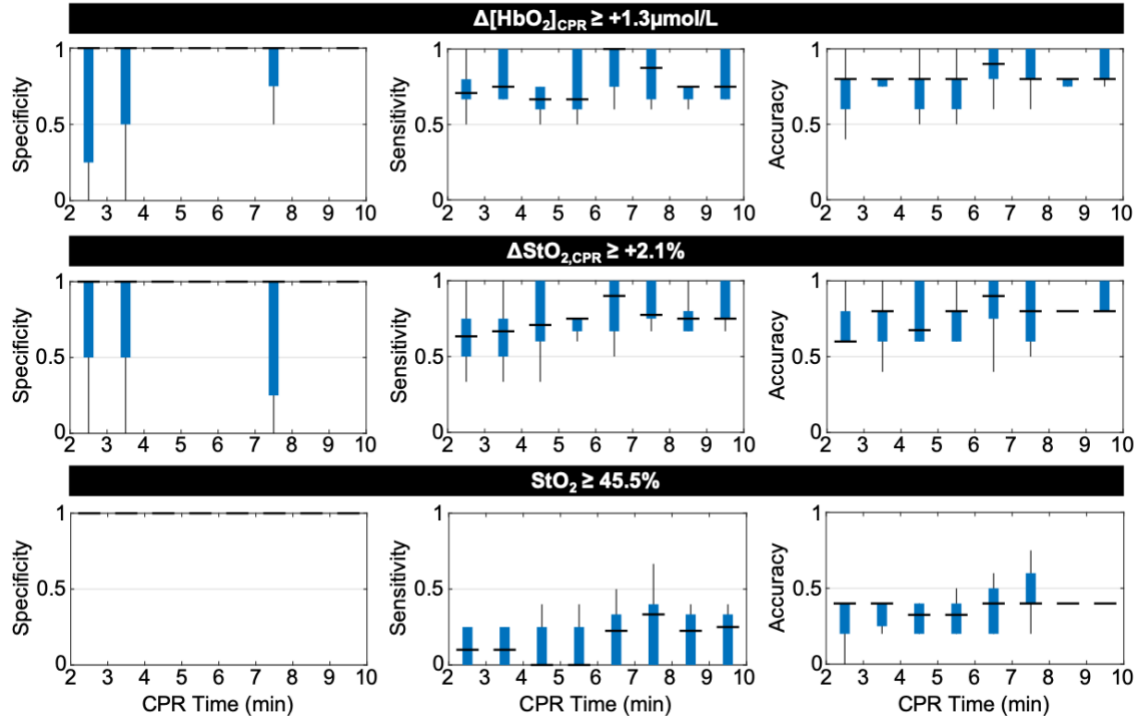

### Supplementary Figure S3. Time-Dependent 10-fold Decision Threshold

**Performance during Early CPR – Specificity, Sensitivity and Accuracy:** Prediction performance metrics of specificity (*left*), sensitivity (*center*), and accuracy (*right*) are depicted for change in  $[\text{HbO}_2]$  and change in  $\text{StO}_2$  from 1-minute of CPR ( $\Delta[\text{HbO}_2]_{\text{CPR}}$ , *top row*;  $\Delta\text{StO}_{2,\text{CPR}}$ , *middle row*) and absolute value of  $\text{StO}_2$  (*bottom row*) during the first 10 minutes of CPR. Performance was assessed in and summarized across 10 test folds in 1-minute intervals. Superior sensitivity and accuracy are achieved at all CPR time points by change ( $\Delta$ ) parameters compared to absolute  $\text{StO}_2$ .

**Supplementary Table S1. Effect of CPR Strategy on ROSC, Comparison with Depth-Guided CPR**

| <b>CPR Strategy</b> | <b>No ROSC,<br/>n</b> | <b>ROSC,<br/>n</b> | <b>Odds Ratio<br/>(95% CI)</b> | <b>p-value</b> |
|---------------------|-----------------------|--------------------|--------------------------------|----------------|
| DG-CPR (ref)        | 5                     | 9                  | -                              | -              |
| DG-CPR+iNO          | 0                     | 10                 | 6.41 (1.03, ∞)*                | 0.047*         |
| HD-CPR 100%         | 5                     | 10                 | 1.21 (0.21, 7.26)              | 1.000          |
| HD-CPR 21%          | 1                     | 8                  | 4.19 (0.35, 236.0)             | 0.417          |

\*Median unbiased estimate with one-sided p-value due to absence of “No ROSC” subjects.

*Definition of abbreviations:* ref = reference group; DG-CPR = depth-guided CPR strategy;

DG-CPR+iNO = depth-guided CPR with inhaled nitric oxide; HD-CPR 100% =

hemodynamic-directed CPR with 100% fraction of inhaled oxygen; HD-CPR 21% =

hemodynamic-directed CPR with 21% fraction of inhaled oxygen

**Supplementary Table S2. Effect of CPR Strategy on Cerebral Hemodynamics, Comparison with Depth-Guided CPR**

|                                     | DG-CPR<br>n=14<br>Median [IQR] | DG-CPR+iNO<br>n=10<br>Median [IQR] | p-value |
|-------------------------------------|--------------------------------|------------------------------------|---------|
| <b>CPR, 10 minutes</b>              |                                |                                    |         |
| [HbO <sub>2</sub> ], μmol/L         | 22.3 [17.7, 28.7]              | 27.1 [21.3,35.3]                   | 0.266   |
| Δ[HbO <sub>2</sub> ] from Baseline  | -10.2 [-20.0, -4.2]            | -5.7 [-11.5, -1.7]                 | 0.292   |
| r[HbO <sub>2</sub> ] to Baseline, % | 69.2 [40.2, 81.6]              | 86.1 [55.9, 92.8]                  | 0.292   |
| Δ[HbO <sub>2</sub> ] from 1min-CPR  | +3.0 [-1.3, 7.5]               | +7.4 [2.1, 8.8]                    | 0.292   |
| r[HbO <sub>2</sub> ] to 1min-CPR, % | 114.3 [92.4, 135.7]            | 133.3 [109.7, 146.2]               | 0.320   |
| StO <sub>2</sub> , %                | 30.8 [27.8, 39.0]              | 41.3 [36.1, 48.0]                  | 0.143   |
| ΔStO <sub>2</sub> from Baseline     | -15.6 [-26.8, -9.1]            | -15.3 [-24.0, -5.4]                | 0.598   |
| rStO <sub>2</sub> to Baseline, %    | 66.5 [50.0, 80.2]              | 74.2 [58.9, 88.2]                  | 0.447   |
| ΔStO <sub>2</sub> from 1min-CPR     | +3.3 [-1.1, +7.3]              | +7.5 [3.6, 13.9]                   | 0.219   |
| rStO <sub>2</sub> to 1min-CPR, %    | 110.8 [91.1, 121.7]            | 125.8 [111.1,142.6]                | 0.349   |
| THC, μmol/L                         | 65.0 [61.5, 76.8]              | 67.1 [62.1, 73.5]                  | 0.725   |
| ΔTHC from Baseline                  | +3.2 [-3.2, 6.6]               | +6.1 [2.6, 9.1]                    | 0.266   |
| rTHC to Baseline, %                 | 105.5 [95.3, 110.0]            | 111.1 [105.2, 114.6]               | 0.160   |
| ΔTHC from 1min-CPR                  | +1.0 [-4.9, 6.1]               | +1.4 [-3.1, 3.5]                   | 0.725   |
| rTHC to 1min-CPR, %                 | 101.6 [93.6, 108.7]            | 102.0 [94.9, 107.1]                | 0.725   |

*Definition of abbreviations:* DG-CPR = depth-guided CPR strategy; DG-CPR+iNO = depth-guided CPR with inhaled nitric oxide; [HbO<sub>2</sub>] = oxy-hemoglobin concentration; [Hb] = deoxy-hemoglobin concentration; StO<sub>2</sub> = tissue oxygen saturation; THC = total hemoglobin concentration; Δ-prefix = absolute change; r-prefix = relative value compared to 100% at baseline.

**Supplementary Table S3. Odds Ratio (OR) and Standard Error (SE) of ROSC for Individual Cerebral Hemodynamic Parameters at 10-Minutes of CPR, Adjusted by CPR Strategy**

|                                     | Unadjusted        |         | Adjusted          |         |
|-------------------------------------|-------------------|---------|-------------------|---------|
|                                     | OR (95% CI)       | p-value | OR (95% CI)       | p-value |
| [HbO <sub>2</sub> ], μmol/L         | 1.14 (1.01, 1.34) | 0.040   | 1.19 (1.00,1.55)  | 0.053   |
| Δ[HbO <sub>2</sub> ] from Baseline  | 1.31 (1.08, 1.79) | <0.001  | 1.59 (1.08, 8.20) | 0.002   |
| r[HbO <sub>2</sub> ] to Baseline, % | 1.10 (1.02,1.21)  | 0.002   | 1.12 (1.03,1.31)  | 0.003   |
| Δ[HbO <sub>2</sub> ] from 1min-CPR  | 1.73 (1.14, 4.70) | <0.001  | 2.13 (1.19, ∞)    | <0.001* |
| r[HbO <sub>2</sub> ] to 1min-CPR, % | 1.11 (1.03, 1.28) | <0.001  | 1.15 (1.04, ∞)    | <0.001* |
| StO <sub>2</sub> , %                | 1.10 (1.01, 1.24) | 0.033   | 1.18 (1.01, 1.55) | 0.040   |
| ΔStO <sub>2</sub> from Baseline     | 1.23 (1.05, 1.56) | 0.004   | 1.28 (1.06, 1.83) | 0.004   |
| rStO <sub>2</sub> to Baseline, %    | 1.07 (1.01, 1.16) | 0.013   | 1.13 (1.02, 1.31) | 0.010   |
| ΔStO <sub>2</sub> from 1min-CPR     | 1.63 (1.17, 3.36) | <0.001  | 2.50 (1.21, ∞)    | <0.001* |
| rStO <sub>2</sub> to 1min-CPR, %    | 1.14 (1.04, 1.33) | <0.001  | 1.28 (1.06, ∞)    | <0.001* |
| THC, μmol/L                         | 1.05 (0.93, 1.20) | 0.453   | 1.06 (0.93, 1.22) | 0.428   |
| ΔTHC from Baseline                  | 1.26 (1.06, 1.63) | 0.002   | 1.23 (1.03, 1.65) | 0.013   |
| rTHC to Baseline, %                 | 1.18 (1.05, 1.42) | 0.002   | 1.16 (1.02, 1.41) | 0.012   |
| ΔTHC from 1min-CPR                  | 1.34 (1.08, 2.01) | 0.001   | 1.37 (1.05, 2.42) | 0.006   |
| rTHC to 1min-CPR, %                 | 1.24 (1.06, 1.65) | 0.002   | 1.23 (1.03, 1.70) | 0.008   |

\*Median unbiased estimate with one-sided p-value.

*Definition of abbreviations:* [HbO<sub>2</sub>] = oxy-hemoglobin concentration; [Hb] = deoxy-hemoglobin concentration; StO<sub>2</sub> = tissue oxygen saturation; THC = total hemoglobin concentration; Δ-prefix = absolute change; r-prefix = relative value compared to 100% at baseline.
